# Supplementary material
Source: publisher figshare collection journal article supplement (https://gsajournals.figshare.com/articles/dataset/_/6317840)
Supplement: Supplementary file 1 [file 1]

| Name | Sequence [5'–3'] | Usage |
| --- | --- | --- |
| 3Ds-inverse-FW1 | TCCCGTTCGTTTTCGTTACC | Inverse PCR for the attP landing sites |
| 3Ds-inverse-RV1 | ACATAAGTGATAAGTCTTGGGCT | Inverse PCR for the attP landing sites |
| 3Ds-inverse-FW2 | TACCGACCGTTTTCATCCCT | Inverse PCR for the attP landing sites |
| 3Ds-inverse-RV2 | AAGAAGCCATATAAGTCTACTCTACG | Inverse PCR for the attP landing sites |
| chr7-FW | GCACCTCTGGCAAAATGACT | genomic primer for the *attPchr7* strain |
| chr7-RV | CAGTTGAAGCTGTTTGGGGT | genomic primer for the *attPchr7* strain |
| chr8-FW | TTCTGTCATTTGAACCGACGC | genomic primer for the *attPchr8* strain |
| chr8-RV | GCAGAGGAGAACACCAGAGA | genomic primer for the *attPchr8* strain |
| chr9-FW | GGCCTGCAGAATAGTTTAAGCA | genomic primer for the *attPchr9* strain |
| chr9-RV | TAACGTGTTTGCTTGGGTGG | genomic primer for the *attPchr9* strain |
| chr10-FW | TCTCACCTCTGGCCAAACTT | genomic primer for the *attPchr10* strain |
| chr10-RV | TGTACCCTCCAACCACTCAC | genomic primer for the *attPchr10* strain |
| chr11-FW | CAGCAACTCGTGACCCAAAA | genomic primer for the *attPchr11* strain |
| chr11-RV | ACCAAATCCTGAGAGAGACC | genomic primer for the *attPchr11* strain |
| chr13-FW | AAGAAAGCCCAGTTGCATGG | genomic primer for the *attPchr13* strain |
| chr13-RV | GGCGGGTTTTGGTGAGATTT | genomic primer for the *attPchr13* strain |
| chr17-FW | CCGCCTTTTCTGTGTCACAA | genomic primer for the *attPchr17* strain |
| chr17-RV | TGTGTTTCCAGTGGTGTCCA | genomic primer for the *attPchr17* strain |
| chr18-FW | TCAGCAGTCTAAACCAGGGG | genomic primer for the *attPchr18* strain |
| chr18-RV | GGTGTTGTGCAGTTCACCGG | genomic primer for the *attPchr18* strain |
| chr20-FW | TTACCACAGTCAGCCACGAT | genomic primer for the *attPchr20* strain |
| chr20-RV | CCAGTTGCATGGTTGTTGGT | genomic primer for the *attPchr20* strain |
| chr22-FW | AGACACATTCCCACGTACGT | genomic primer for the *attPchr22* strain |
| chr22-RV | TGTTTTACTGCCATCGCCAG | genomic primer for the *attPchr22* strain |
| chr24-FW | TTGGGCATTTTGGAGTCGTG | genomic primer for the *attPchr24* strain |
| chr24-RV | TCCCCAAACCAGATCCCTTC | genomic primer for the *attPchr24* strain |
| scf2752-FW | AGGCCTGATCGCATGTTACT | genomic primer for the *attPscf2752* strain |
| scf2752-RV | CCTGATGGGTCTGTTCTCTGA | genomic primer for the *attPscf2752* strain |
| 5Ds-RV | TGAGCTAGCTTGCAGTCATCCCGAATTAG | Cloning and sequencing for upstream sequences of the attP landing sites |
| mCherry-529FW | CACTACGACGCTGAGGTCAAG | Cloning for downstream sequences of the attP landing sites |
| 3Ds-FW | GACGAATTCAGATCTCGTAGAGTAGACTTATATGGCTTC | Sequencing for downstream sequences of the attP landing sites |
